# Supplementary material for: Effect of Electronic Conductivities of Iridium Oxide/Doped SnO<sub>2</sub> Oxygen-Evolving Catalysts on the Polarization Properties in Proton Exchange Membrane Water Electrolysis
Source: Preprints.org preprint supplement (doi:10.20944/preprints201811.0285.v1), 2018-11-12
Supplement: Supplementary file 1 [file supplementary]

## **Supplementary Materials:**

# **Effect of Electronic Conductivities of Iridium Oxide/Doped SnO<sub>2</sub> Oxygen-Evolving Catalysts on the Polarization Properties in Proton Exchange Membrane Water Electrolysis**

Hideaki Ohno<sup>1</sup>, Shinji Nohara<sup>2,3</sup>, Katsuyoshi Kakinuma<sup>3</sup>, Makoto Uchida<sup>3</sup>, and  
Hiroyuki Uchida<sup>2,3,\*</sup>

<sup>1</sup>Special Doctoral Program for Green Energy Conversion Science and Technology, Integrated Graduate School of Medicine, Engineering and Agricultural Science, University of Yamanashi, 4 Takeda, Kofu 400-8510, Japan

<sup>2</sup>Clean Energy Research Center, University of Yamanashi, 4 Takeda, Kofu 400-8510, Japan

<sup>3</sup>Fuel Cell Nanomaterials Center, University of Yamanashi, 6-43 Miyamae, Kofu 400-0021, Japan

\*Correspondence: h-uchida@yamanashi.ac.jp

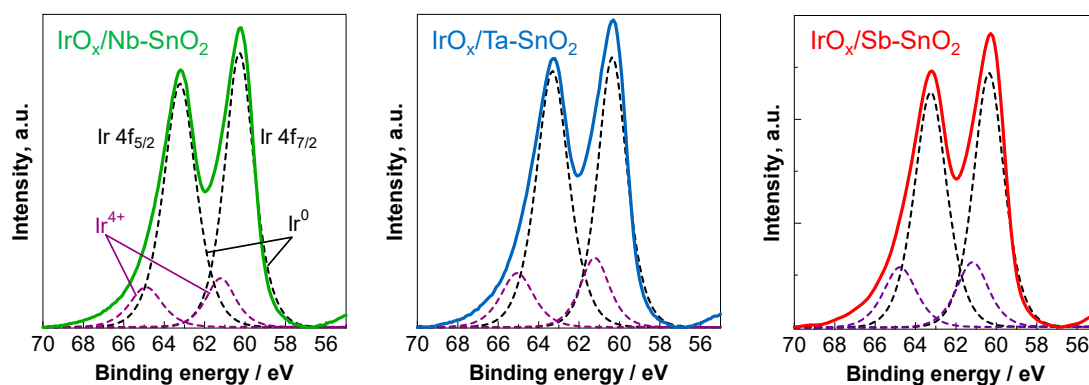

**Figure S1.** X-ray photoelectron spectra (XPS) of  $\text{IrO}_x/\text{M-SnO}_2$  ( $\text{M} = \text{Nb}, \text{Ta}, \text{and Sb}$ ) catalysts. Peaks around 64 and 60 eV were assigned to Ir  $4f_{5/2}$  and  $4f_{7/2}$ , respectively. These peaks were deconvoluted into symmetric Gaussian peaks corresponding to metallic Ir and  $\text{Ir}^{4+}$  ( $\text{IrO}_2$ ) components.

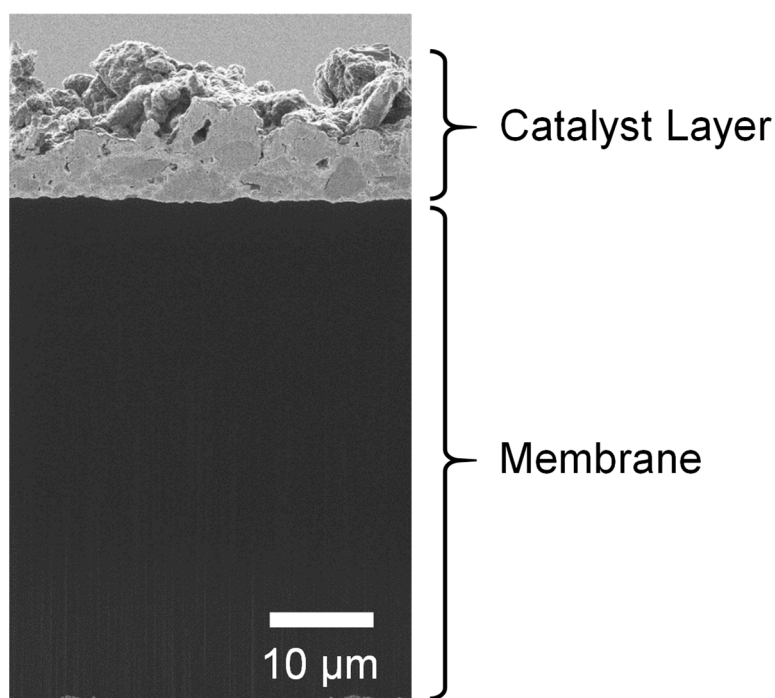

**Figure S2.** Secondary ion microscope (SIM) image of the cross-section at the anode for the CCM with  $\text{IrO}_x/\text{Sb-SnO}_2$  catalyst. The average thickness and the standard deviation of the catalyst layer was  $9.6 \pm 3.1 \mu\text{m}$ .
